# Supplementary material for: CD22low/Bcl-2high expression identifies poor response to inotuzumab ozogamicin in relapsed/refractory acute lymphoblastic leukemia
Source: PubMed Central journal article supplement — Blood Adv. 2022 May 5;7(2):251–5. doi: 10.1182/bloodadvances.2021006810 (PMC9840233; doi:10.1182/bloodadvances.2021006810), 2022-05-05
Supplement: BLOODA_ADV-2021-006810-mmc1.pdf [file BLOODA_ADV-2021-006810-mmc1.pdf]

# Supplemental Data

## Supplemental Methods

### *Study samples*

Twenty-eight patients (age 1-21 years-old) with either relapsed CD22-positive B-ALL, relapse after HCT, first or greater relapse for Down syndrome, or patients refractory to two prior induction regimens were enrolled in the COG AALL1621 single arm phase 2 trial. CD22 positivity was requirement for enrollment with no threshold applied. Patients received one cycle of InO at the FDA-approved adult dose of 1.8mg/m<sup>2</sup> (0.8mg/m<sup>2</sup> on day 1, 0.5mg/m<sup>2</sup> on days 8 and 15). Based on response at day 28 (cycle 1), patients with at least stable disease (SD) could receive a second cycle; those with CR/CR with incomplete count recovery (CRi) received InO 0.5mg/m<sup>2</sup> on days 1, 8, and 15 in cycle 2, while those without CR/CRi received the same fractionated dose as cycle 1. Patients with CR/CRi after 2 cycles were eligible to receive up to 6 total cycles. Samples for this study were collected before treatment with InO, at end of cycle 1 and end of cycle 2<sup>1</sup>. A total of 68 samples from 28 patients were analyzed (Supplemental Table 1).

Response rates (Supplemental Table 2): CR was defined as an M1 marrow (<5%) without circulating blasts or persistent extramedullary disease and with recovery of ANC to > 500/ $\mu$ L and platelet count >50,000/ $\mu$ l without transfusion for 7 days. CRi was defined as an M1 marrow without count recovery. Partial response (PR) included those with an M2 marrow with  $\geq$ 5-25% blasts if originally diagnosed with an M3 marrow (>25% blasts), with or without resolution of extramedullary disease. Progressive disease (PD) was defined as an increase in marrow blast percentage or the appearance of new sites of leukemia during therapy. Note: Clinical MRD was determined by COG-approved laboratories at each treating institution and was not performed centrally.

### *CyTOF marker labeling and detection*

Peripheral blood mononuclear cells (PBMCs) or marrow cells were Ficoll-isolated and cryopreserved. To identify live cells, thawed cells were labeled with 0.5  $\mu$ M cisplatin (Cell-ID Cisplatin 198, Fluidigm) for 5 min at room temperature (RT) and quenched with 5x volume autoMACS buffer (Miltenyi Biotec). Next, cells were fixed in 1.6% paraformaldehyde-PBS (PFA; Electron Microscopy Sciences, Cat. #15710). After fixation, each sample was barcoded with individual triplets of 15  $\mu$ M Paladium 20-plex barcodes in 0.02% Saponin-PBS (UCSF Flow Core). Cells were washed 3x using autoMACS buffer before pooling. Pooled samples were sequentially stained with three antibody cocktails: surface marker antibodies (cocktail A) and intracellular proteins (cocktails B and C). Heavy-metal isotope-conjugated antibodies are listed in Supplemental Table 3. Cells were incubated with each cocktail for 30 min at RT. Before staining with antibody cocktails B and C, cells were permeabilized with MaxPar Perm-S buffer (Fluidigm; 20 min incubation on ice) and methanol (Electron Microscopy Sciences, Cat. #18510; 15 min incubation on ice), respectively. Finally, total cells were identified by DNA intercalation (0.125  $\mu$ M MaxPar Intercalator-Ir, Fluidigm) in 1.6% PFA at 4°C overnight and labeled cells were recorded on the Helios CyTOF2 instrument using an event rate of ~400-600 events/sec run with normalization beads (EQ Four Element Calibration Beads #201078; Fluidigm).

### *Tumor cell identification by conventional gating strategy*

Mass cytometry files were normalized through a data normalization algorithm<sup>2</sup>. Intensity values of a sliding window of bead standards corrected for instrument fluctuations and between samples. Following normalization and debarcoding, data were analyzed using FlowJo 10.7.1 (FlowJo LLC, Ashland, OR). In short, singlets were gated by event length and DNA; live cells were identified as cisplatin-negative cells. Tumor cells found in CD3-/CD235-/CD16-/CD33- or CD33dim cells were further identified by B cell lineage markers and CD34 (Supplemental Figure 12).

### *High-dimensional analysis of training cohort*

Clinical outcomes of nine randomly selected patients were unblinded and used as the training cohort to develop the predictor algorithm (Supplemental Table 4). COG outcomes CR and CRi were grouped as 'CR', whereas patients with PR, SD, and PD were labeled as 'non-CR/CRi'. After identification of tumor cells from patients in the training cohort (Supplemental Figure 12), cell-community clustering (CCC) analysis was performed using an R-based workflow<sup>3</sup>. Briefly, the training cohort samples were processed to generate cluster statistics and memberships for every cell event from the grappolo package<sup>4</sup>, and a clustering plot was generated using CD22 and intracellular molecules to calculate similarities between nodes from the vite package<sup>5</sup>. Grouping was based on known InO outcome (CR/CRi vs. non-CR/CRi), individual identification or timepoint to identify leukemic cells clusters corresponding to indicated outcomes. For single cell phenotyping and intramolecular characterization, following t-SNE analysis of live cells based on the cytofit workflow<sup>6</sup>, single cell matrix data of tumor cells identified by surface markers were extracted (Supplemental Figure 3), and used for further analysis.

### *Validation cohort analysis*

The predictive algorithm from high-dimensional analysis of the training cohort was applied to the validation cohort (19 patients; Supplemental Table 5) in a blinded fashion. Collective results are displayed for all 28 patients.

### *Statistical analysis*

Statistical analyses were performed using R software (R version 3.6.1). Application of predictive values was determined using Fisher's exact test. Comparison of size of cluster nodes and leukemic cell fraction frequency was performed using Student t-test. Correlation of cell marker expression was performed using the Pearson product-moment correlation coefficient. Area under the curve (AUC) of receiving operating characteristic (ROC) curve was tested using Delong's test. Statistical significance was defined as  $P < 0.05$  with a two-tailed test.

## Supplemental References

1. O'Brien MM, Ji L, Shah NN, et al. A Phase 2 Trial of Inotuzumab Ozogamicin (InO) in Children and Young Adults with Relapsed or Refractory (R/R) CD22+ B-Acute Lymphoblastic Leukemia (B-ALL): Results from Children's Oncology Group Protocol AALL1621. *J Clin Oncol*. 2022;Jan 10:JCO2101693.
2. Finck R, Simonds EF, Jager A, et al. Normalization of mass cytometry data with bead standards. *Cytom. Part A*. 2013;83A(5):483–494.
3. <https://github.com/ParkerICI/flow-analysis-tutorial>.
4. <https://github.com/ParkerICI/grappolo>.
5. <https://github.com/ParkerICI/vite>.
6. Chen H, Lau MC, Wong MT, et al. Cytofkit: A Bioconductor Package for an Integrated Mass Cytometry Data Analysis Pipeline. *PLoS Comput. Biol*. 2016;12(9):e1005112–e1005112.

**Supplemental Table 1: Clinical characteristics of 48 patients enrolled in the COG AALL1621 single arm phase 2 trial including the 28 patients analyzed in this study**

| Patient Characteristic                     | (n = 48)        | Analyzed<br>(n = 28) | Not-analyzed<br>(n = 20) | P value |
|--------------------------------------------|-----------------|----------------------|--------------------------|---------|
| <b>Age at Enrollment (years)</b>           |                 |                      |                          | 0.66    |
| Median (range)                             | 9 (1, 21)       | 9 (1, 20)            | 12.5 (1, 21)             |         |
| 1-9                                        | 25 (52%)        | 16 (57%)             | 9 (45%)                  |         |
| 10-12                                      | 4 (8%)          | 3 (11%)              | 1 (5%)                   |         |
| 13-17                                      | 11 (23%)        | 5 (18%)              | 6 (30%)                  |         |
| 18-21                                      | 8 (17%)         | 4 (14%)              | 4 (20%)                  |         |
| <b>Sex</b>                                 |                 |                      |                          | 0.21    |
| Female                                     | 19 (40%)        | 9 (32%)              | 10 (50%)                 |         |
| Male                                       | 29 (60%)        | 19 (68%)             | 10 (50%)                 |         |
| <b>Self-Reported Race</b>                  |                 |                      |                          | 0.21    |
| Asian                                      | 2 (5%)          | 0                    | 2 (12%)                  |         |
| Black or African American                  | 5 (12%)         | 2 (8%)               | 3 (18%)                  |         |
| White                                      | 34 (81%)        | 22 (88%)             | 12 (71%)                 |         |
| Multiple Races                             | 1 (2%)          | 1 (4%)               | 0                        |         |
| Unknown                                    | 6               | 3                    | 3                        |         |
| <b>Self-Identified Ethnicity</b>           |                 |                      |                          | 1.00    |
| Hispanic or Latino                         | 11 (26%)        | 7 (28%)              | 4 (24%)                  |         |
| Not Hispanic or Latino                     | 31 (74%)        | 18 (72%)             | 13 (76%)                 |         |
| Unknown                                    | 6               | 3                    | 3                        |         |
| <b>Type of Relapse/Refractory</b>          |                 |                      |                          | 0.59    |
| Second or greater relapsen                 | 32 (67%)        | 19 (68%)             | 13 (65%)                 |         |
| First relapse refractory to at least one   | 10 (21%)        | 4 (14%)              | 6 (30%)                  |         |
| Primary refractory disease with at least 2 | 2 (4%)          | 2 (7%)               | 0                        |         |
| Any relapse after HSCT                     | 3 (6%)          | 2 (7%)               | 1 (5%)                   |         |
| First relapse with no prior re-induction   | 1 (2%)          | 1 (4%)               | 0                        |         |
| <b>CNS Status at Enrollment</b>            |                 |                      |                          | 1.00    |
| CNS 1                                      | 44 (92%)        | 26 (93%)             | 18 (90%)                 |         |
| CNS 2                                      | 0               | 0                    | 0                        |         |
| CNS 3                                      | 4 (8%)          | 2 (7%)               | 2 (10%)                  |         |
| <b>Down Syndrome</b>                       |                 |                      |                          | 0.26    |
| No                                         | 45 (94%)        | 25 (89%)             | 20 (100%)                |         |
| Yes                                        | 3 (6%)          | 3 (11%)              | 0                        |         |
| <b>Prior HSCT</b>                          |                 |                      |                          | 1.00    |
| No                                         | 37 (77%)        | 22 (79%)             | 15 (75%)                 |         |
| Yes                                        | 11 (23%)        | 6 (21%)              | 5 (25%)                  |         |
| <b>Prior CAR T-cell Therapy</b>            |                 |                      |                          | 0.74    |
| No                                         | 37 (77%)        | 21 (75%)             | 16 (80%)                 |         |
| Yes                                        | 11 (23%)#       | 7 (25%)              | 4 (20%)                  |         |
| CD19 product                               | 10              | 7                    | 3                        |         |
| <b>Prior Blinatumomab Therapy</b>          |                 |                      |                          | 0.45    |
| No                                         | 34 (71%)        | 21 (75%)             | 13 (65%)                 |         |
| Yes                                        | 14 (29%)        | 7 (25%)              | 7 (35%)                  |         |
| <b>WBC (1000/mL) at Study Entry</b>        |                 |                      |                          |         |
| Median (range)                             | 5.75 (0.3, 547) | 7.45 (0.8, 547)      | 3.05 (0.3, 386)          |         |
| <b>Marrow Blasts (%) at Study Entry</b>    |                 |                      |                          | 0.46    |
| Median (range)                             | 81 (6, 100)     | 84.5 (6, 99)         | 75.5 (8, 100)            |         |
| M2 (5%-25%)                                | 9 (19%)         | 4 (14%)              | 5 (25%)                  |         |
| M3 (>25%)                                  | 39 (81%)        | 24 (86%)             | 15 (75%)                 |         |
| <b>Cytogenetics/FISH</b>                   |                 |                      |                          |         |
| <i>Trisomy 4 &amp; 10</i>                  | 0               | 0                    | 0                        | 1.00    |
| <i>ETV6-RUNX1 t(12;21)(p13;q22)</i>        | 5 (12%)         | 4 (16%)              | 1 (6%)                   | 0.63    |
| <i>iAMP21</i>                              | 2 (5%)          | 1 (4%)               | 1 (6%)                   | 1.00    |
| <i>KMT2A rearrangement</i>                 | 6 (14%)         | 3 (12%)              | 3 (18%)                  | 0.67    |
| <i>BCR-ABL1 t(9;22)</i>                    | 2 (5%)          | 1 (4%)               | 1 (6%)                   | 1.00    |
| Other                                      | 14 (33%)        | 9 (36%)              | 5 (29%)                  | 0.75    |
| <i>PBX1-TCF3 t(1;19)</i>                   | 4               | 2                    | 2                        |         |
| Not available                              | 6 (13%)         | 3 (11%)              | 3 (15%)                  |         |

#one patient had prior CD19 and CD22 CAR-T cell therapy

Abbreviations: CAR, chimeric antigen receptor; FISH, fluorescence in situ hybridization; HSCT, hematopoietic stem cell transplantation; WBC, white blood cell count

**Supplemental Table 2: Morphologic and minimal residual disease response to two cycles of Inotuzumab ozogamicin for 28 analyzed patients**

| Cycle 1 Response    | Number of patients (total N = 28) | % among 28 patients | Number of patients who received cycle 2 (total n=18) | Cycle 2 Response                                                                                             | Assigned category in this manuscript                                                                                 |
|---------------------|-----------------------------------|---------------------|------------------------------------------------------|--------------------------------------------------------------------------------------------------------------|----------------------------------------------------------------------------------------------------------------------|
| CR/CRi, MRD <0.01%  | 13                                | 46.4%               | 10                                                   | <ul style="list-style-type: none"> <li>10 CR/CRi, MRD &lt;0.01%</li> </ul>                                   | <ul style="list-style-type: none"> <li>CR/CRi</li> </ul>                                                             |
| CR/CRi, MRD ≥ 0.01% | 3                                 | 10.7%               | 1                                                    | <ul style="list-style-type: none"> <li>1 PD</li> </ul>                                                       | <ul style="list-style-type: none"> <li>non-CR/CRi</li> </ul>                                                         |
| PR                  | 2                                 | 7.1%                | 2                                                    | <ul style="list-style-type: none"> <li>1 CRi, MRD ≥0.01%</li> <li>1 PD</li> </ul>                            | <ul style="list-style-type: none"> <li>CR/CRi</li> <li>non-CR/CRi</li> </ul>                                         |
| SD                  | 8                                 | 28.6%               | 5                                                    | <ul style="list-style-type: none"> <li>1 CR, MRD ≥0.01%</li> <li>2 PR</li> <li>1 SD</li> <li>1 PD</li> </ul> | <ul style="list-style-type: none"> <li>CR/CRi</li> <li>non-CR/CRi</li> <li>non-CR/CRi</li> <li>non-CR/CRi</li> </ul> |
| PD                  | 2                                 | 7.1%                | 0 (not eligible for further therapy after cycle 1)   |                                                                                                              | <ul style="list-style-type: none"> <li>non-CR/CRi</li> </ul>                                                         |

Abbreviations: CR; complete response; CRi, complete response with incomplete count recovery, MRD, minimal residual disease; PD, progressive disease; PR, partial response; SD, stable disease.

**Supplemental Table 3. Mass cytometry panel**

| Antigen target       | Metal tag | Supplier       | Clone      | Catalog #  |
|----------------------|-----------|----------------|------------|------------|
| BAD                  | 151 Eu    | BioLegend      | W16055A    | 795502     |
| Bcl-2                | 153 Eu    | Bio-Rad        | 100        | MCA1550    |
| Bcl-xL               | 147Sm     | proteintech    | 4C12A6     | 66020-1-Ig |
| Bim                  | 145 Nd    | Abclonal       | N.D        | A19702     |
| CD10                 | 156 Gd    | Fluidigm       | HI10A      | 3156001B   |
| CD117 (ckit)         | 143 Nd    | Fluidigm       | 104D2      | 3143001B   |
| CD16                 | 209 Bi    | Fluidigm       | 3G8        | 3144001B   |
| CD179a (VpreB)       | 143 Sm    | Fluidigm       | HSL96      | 3149012B   |
| CD19                 | 142 Nd    | Fluidigm       | HIB19      | 3142001B   |
| CD20                 | 171 Yb    | Fluidigm       | 2H7        | 3171012B   |
| CD22                 | 159 Tb    | Fluidigm       | HIB22      | 3159005B   |
| CD235a/b             | 141 Pr    | Fluidigm       | HIR2       | 3141001B   |
| CD24                 | 169 Tm    | Fluidigm       | ML5        | 3169004B   |
| CD3                  | 170 Er    | Fluidigm       | UCHT1      | 3170001B   |
| CD33                 | 163Dy     | Fluidigm       | WM53       | 3169010B   |
| CD34                 | 166 Er    | Fluidigm       | 581        | 3166012B   |
| CD45                 | 89 Y      | Fluidigm       | Hi30       | 3089003B   |
| CD79B (Ig-Beta)      | 162 Dy    | Fluidigm       | CB3-1      | 3162008B   |
| c-Parp               | 154 Sm    | BD Biosciences | 4C10-5     | 7153897    |
| HLA-DR               | 173 Yb    | Fluidigm       | L243       | 3173005B   |
| IgD                  | 146 Nd    | Fluidigm       | IA6-2      | 3146005B   |
| IgM (Surface)        | 172 Yb    | Fluidigm       | MHM-88     | 3172004B   |
| Ki-67                | 168 Er    | Fluidigm       | B56        | 3168007B   |
| Mcl-1                | 174 Yb    | Bio-Rad        | polyclonal | AHP998     |
| MRP1/2               | 148 Nd    | BioLegend      | QCRL3      | 312102     |
| p21                  | 160 Gd    | Abclonal       | N.D        | A19094     |
| p4E-BP1 [Thr37/46]   | 176 Yb    | BioLegend      | A18010A    | 619602     |
| p53                  | 175 Lu    | Bio-Rad        | DO-1       | MCA 1701   |
| pCHK1 [Ser345]       | 165 Ho    | Abclonal       | N.D        | AP0578     |
| pERK 1/2 [T202/Y204] | 167 Er    | Fluidigm       | D1314.4E   | 3167005A   |
| p-GP/MDR1            | 158 Gd    | BioLegend      | C494       | 907001     |
| pLyn [Y418]          | 144 Nd    | abcam          | EP503Y     | ab239824   |
| pNF-kB p65 [S529]    | 155 Gd    | BioLegend      | Poly6226   | 622602     |
| pStat5 [Y694]        | 150 Nd    | Fluidigm       | 47         | 3150005A   |
| TdT                  | 164 Dy    | Fluidigm       | E17-1519   | 3164015B   |

Note: Antibodies that were not purchased from Fluidigm were custom-conjugated as described in Methods.

N.D: not described.

**Supplemental Table 4. Patients used for training cohort**

| COG    | Patient ID | End cycle 1 MRD |        | End cycle 2 MRD |        | Clinical Response, Cicle 1 | Clinical Response, Cicle 2 |
|--------|------------|-----------------|--------|-----------------|--------|----------------------------|----------------------------|
|        |            | Clinical        | CyTOF  | Clinical        | CyTOF  |                            |                            |
| PATGUY | B          | ≤0.01%          | 0%     | ≤0.01%          | 0%     | CR                         | CR                         |
| PAWLZW | O          | ≤0.01%          | 0.50%  | ≤0.01%          | 1.31%  | CR                         | CR                         |
| PAYLUG | H          | ≤0.01%          | 0.28%  | ≤0.01%          | 0.02%  | CR                         | CR                         |
| PAYRKA | L          | ≤0.01%          | 0.48%  | ≤0.01%          | 0.52%  | CRi                        | CR                         |
| PAYRLM | M          | ≤0.01%          | 0.05%  | ≤0.01%          | 0.16%  | CRi                        | CR                         |
| PAVDPU | K          | at least 1.0%   | 6.28%  | at least 1.0%   | 32.96% | PR                         | CRi                        |
| PAVDRV | C          | at least 1.0%   | 31.57% | at least 1.0%   | 70.66% | SD                         | PD                         |
| PAWZIV | P          | 0.1-0.99%       | 3.57%  | at least 1.0%   | 11.58% | CRi                        | PD                         |
| PAWUXD | Z          | at least 1.0%   | 68.75% | at least 1.0%   | 17.08% | SD                         | PR                         |

Note: Clinical MRD was determined by each treating institution and was not performed centrally. N/A: not applicable.

**Supplemental Table 5. Patients used for validation cohort**

| COG    | Patient ID | End cycle 1 MRD |        | End cycle 2 MRD |       | Clinical Response ,Cicle 1 | Clinical Response ,Cicle 2 |
|--------|------------|-----------------|--------|-----------------|-------|----------------------------|----------------------------|
|        |            | Clinical        | CyTOF  | Clinical        | CyTOF |                            |                            |
| PAZJDW | AA         | ≤0.01%          | 0.06%  |                 | N/A   | CR                         |                            |
| PAXXVC | I          | ≤0.01%          | 0.57%  |                 | N/A   | CR                         |                            |
| PAXXFC | J          | ≤0.01%          | 0.46%  |                 | N/A   | CR                         |                            |
| PAZKZH | U          | 0.1-0.99%       | 0%     |                 | N/A   | CR                         |                            |
| PAXFBW | W          | ≤0.01%          | 0.10%  | ≤0.01%          | N/A   | CR                         | CR                         |
| PAZNCH | BB         | ≤0.01%          | 0.19%  | ≤0.01%          | 0.28% | CRi                        | CR                         |
| PAXWZM | D          | 0.1-0.99%       | 0.51%  |                 | N/A   | CRi                        |                            |
| PATCPU | DD         | ≤0.01%          | 3.75%  | ≤0.01%          | N/A   | CR                         | CR                         |
| PATZSN | N          | ≤0.01%          | 0.02%  | ≤0.01%          | 0.10% | CR                         | CR                         |
| PAZITY | R          | at least 1.0%   | 6.66%  | 0.01-0.099%     | 1.48% | SD                         | CR                         |
| PAVHEV | Y          | ≤0.01%          | 1.71%  | ≤0.01%          | 0.66% | CR                         | CR                         |
| PAYIVS | F          | at least 1.0%   | 42.25% |                 | N/A   | SD                         |                            |
| PAWMIM | S          | at least 1.0%   | 6.74%  |                 | N/A   | SD                         |                            |
| PAYNHJ | X          | at least 1.0%   | 4.56%  | at least 1.0%   | N/A   | SD                         | SD                         |
| PAYYZW | CC         |                 | 20.83% |                 | N/A   | PD                         |                            |
| PAUBRC | G          | at least 1.0%   | 11.90% | at least 1.0%   | 3.01% | SD                         | PR                         |
| PAVPXP | V          | at least 1.0%   | 59.28% |                 | N/A   | SD                         |                            |
| PAYGAE | A          | at least 1.0%   | N/A    |                 | N/A   | PR                         | PD                         |
| PAYMXC | E          |                 | N/A    |                 | N/A   | PD                         |                            |

Note: Clinical MRD was determined by each treating institution and was not performed centrally. N/A: not applicable.

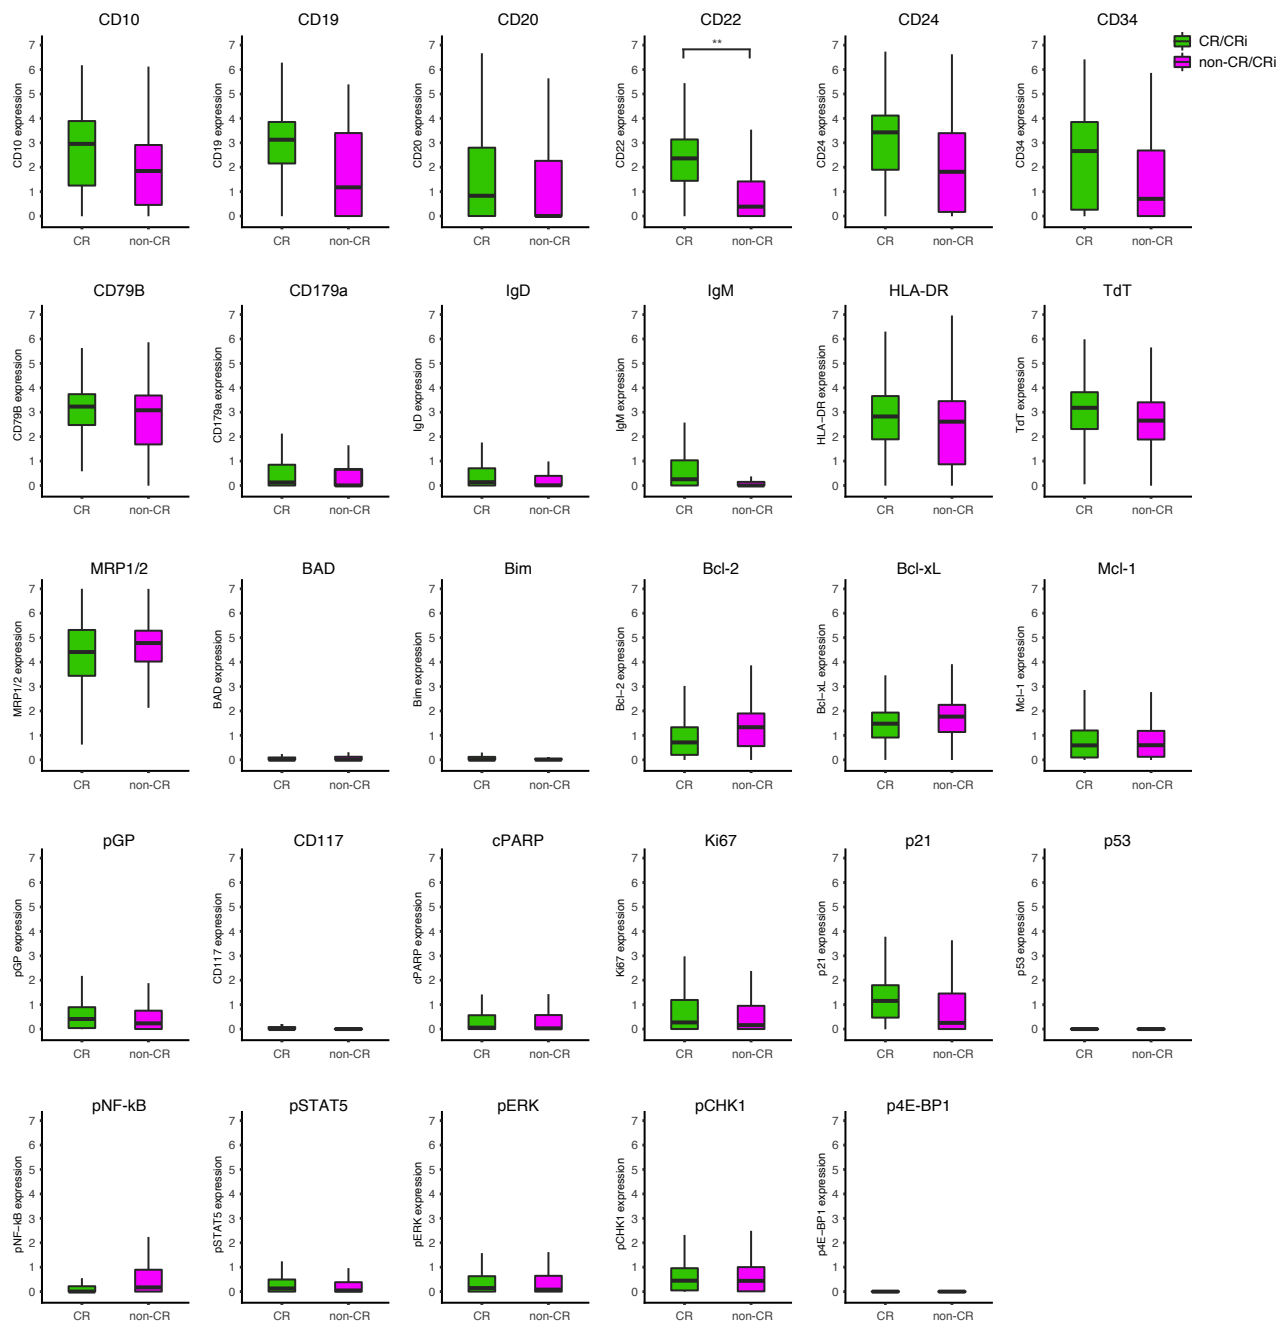

**Supplemental Figure 1. Expression of individual markers on tumor cells in CR/CRI and non-CR/CRI patients.**

Boxplots show marker expression of tumor cells. Data represent CR/CRI patients ( $n = 6$ ) and non-CR/CRI patients ( $n = 3$ ) from the training cohort. Statistical significance for average of marker expression was analyzed using the Student  $t$  test. \*\* $P < 0.01$ .



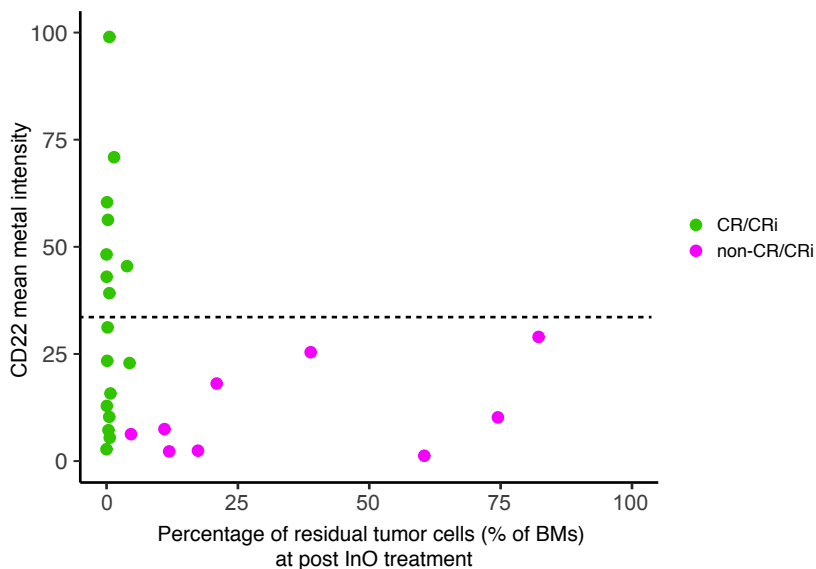

**Supplemental Figure 2. Association between CD22 expression (MMI) pretreatment and residual tumor burden post treatment.** The y-axis indicates CD22 expression as measured by CyTOF mean metal intensity (MMI) prior to InO treatment. The x-axis indicates percentage of residual tumor cells at post InO treatment. Data represent CR/CRi patients (green, n = 17) and non-CR/CRi patients (pink, n = 9). BM, bone marrow cells.

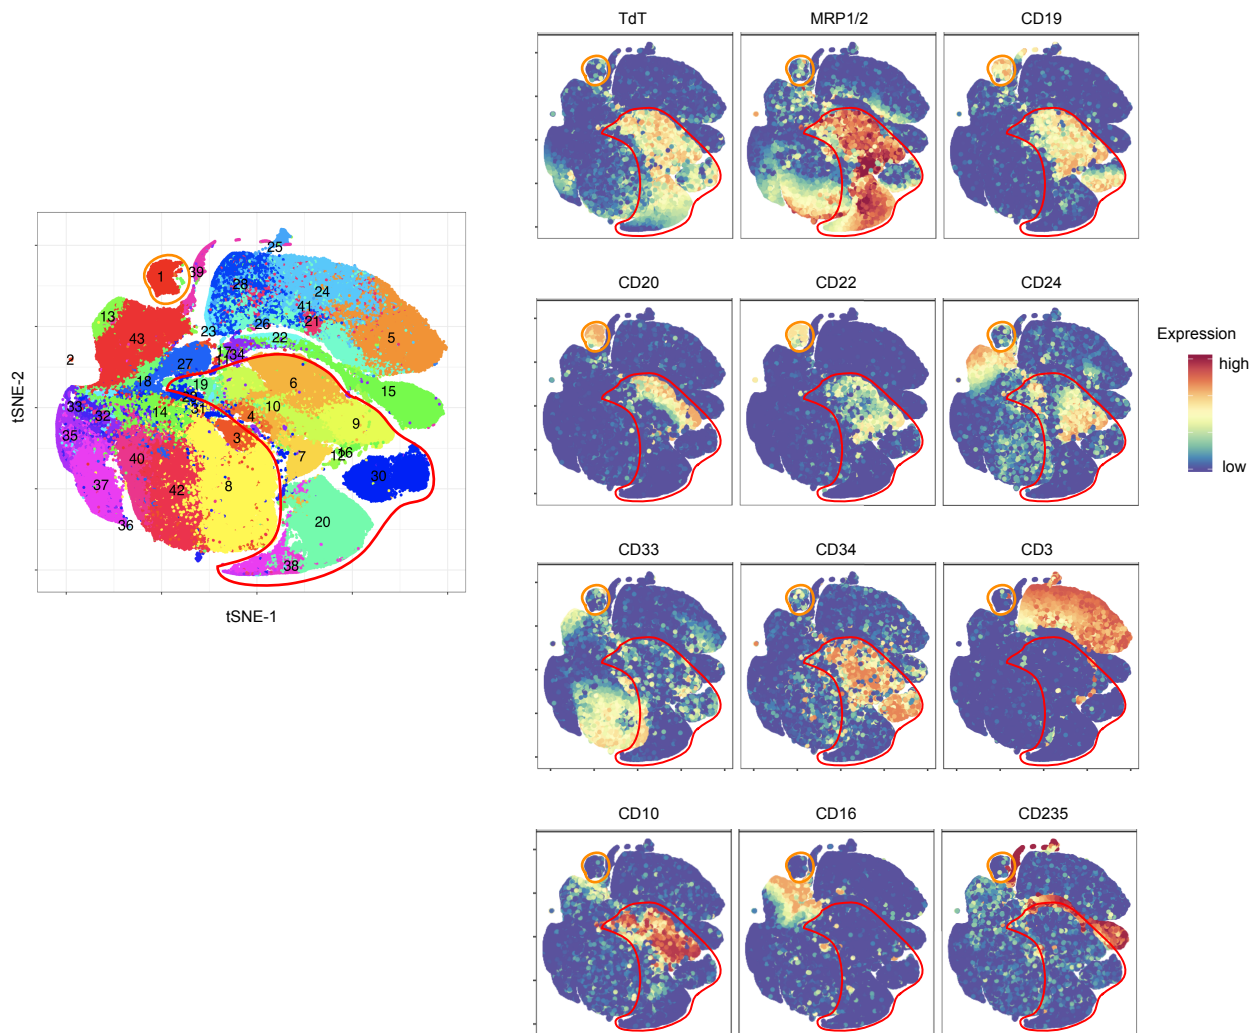

### Supplemental Figure 3. t-SNE analysis of the training cohort.

t-SNE analysis was performed using live cells as described in Supplemental figure 1 and generated 43 clusters. Tumor cells clustered with B-cell lineage markers, CD34 and MRP1/2 were identified as red-shaped clusters based on the distribution of each marker. Normal B cells were identified as orange-shaped clusters. Single cell matrix data of tumor cells were extracted for single cell phenotyping. Data represent CR/CRi patients (n = 6) and non-CR/CRi patients (n = 3) from the training cohort.

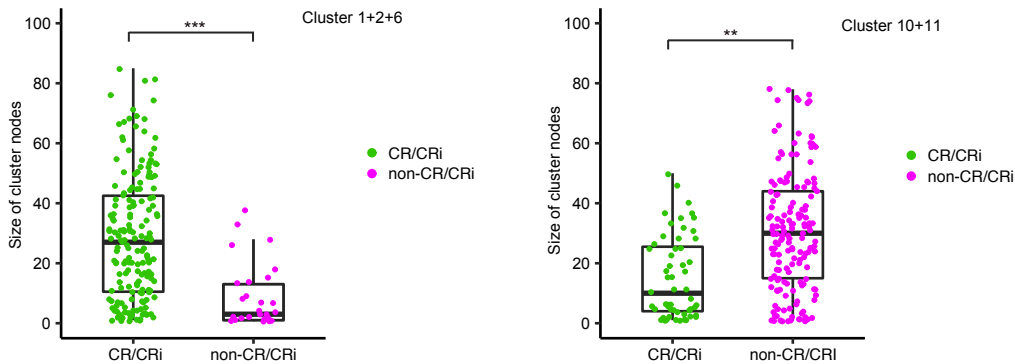

#### Supplemental Figure 4. Comparison of cluster size on cell community clustering analysis

Boxplots showing the size of cluster nodes indicative of good and poor response predictors in the training cohort.

Statistical significance was analyzed using Student *t* test.  $**P < 0.01$ ,  $***P < 0.001$ .

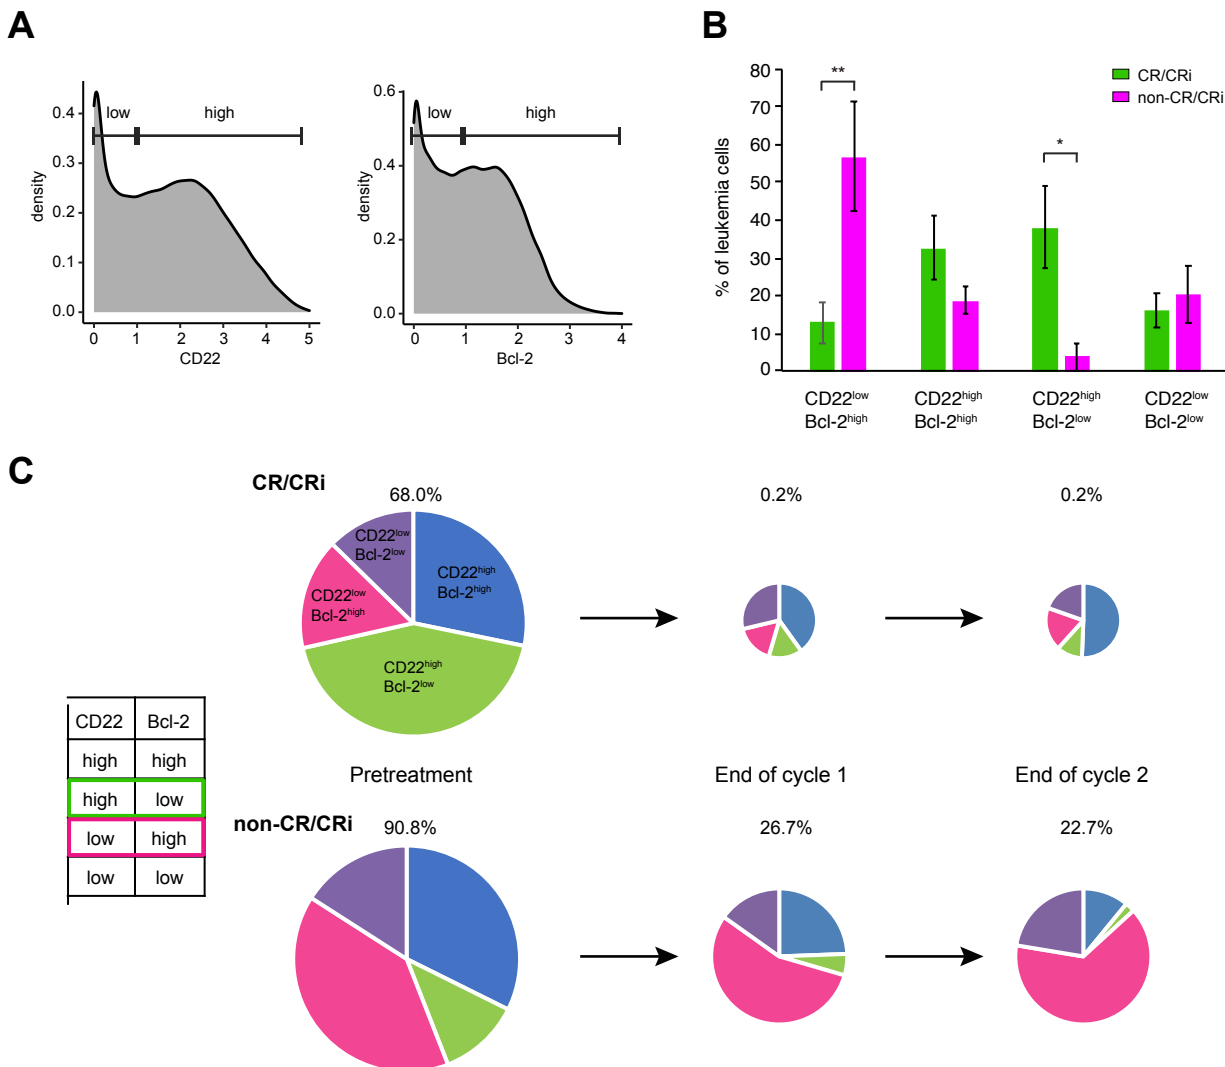

**Supplemental Figure 5. Leukemia cell fractions by CD22 and Bcl-2 expression, and longitudinal analysis of leukemia cell composition over InO treatment**

(A) Cell density plots shown for bimodal expression of CD22 and Bcl-2 expression by CyTOF. Data represent CR/CRi patients ( $n = 6$ ) and non-CR/CRi patients ( $n = 3$ ) from the training cohort. (B) Frequencies of four leukemia cell fractions divided by CD22 and Bcl-2 expression. Data represent the average percentage  $\pm$  SEM from CR/CRi patients ( $n = 6$ ) and non-CR/CRi patients ( $n = 3$ ). Statistical significance was analyzed using Student  $t$  test.  $*P < 0.05$ ,  $**P < 0.01$ . (C) Leukemia cell composition of four fractions by CD22 and Bcl-2 expression at pretreatment, end of 1 cycle, and end of 2 cycle. The values above the pie chart represent the average percentage of leukemia cells in all nucleated cells at each time point. Data represent the average from CR/CRi patients ( $n = 6$ ) and non-CR/CRi patients ( $n = 3$ ). Statistical significance was analyzed using Student  $t$  test.  $**P < 0.01$ ,  $***P < 0.001$ .

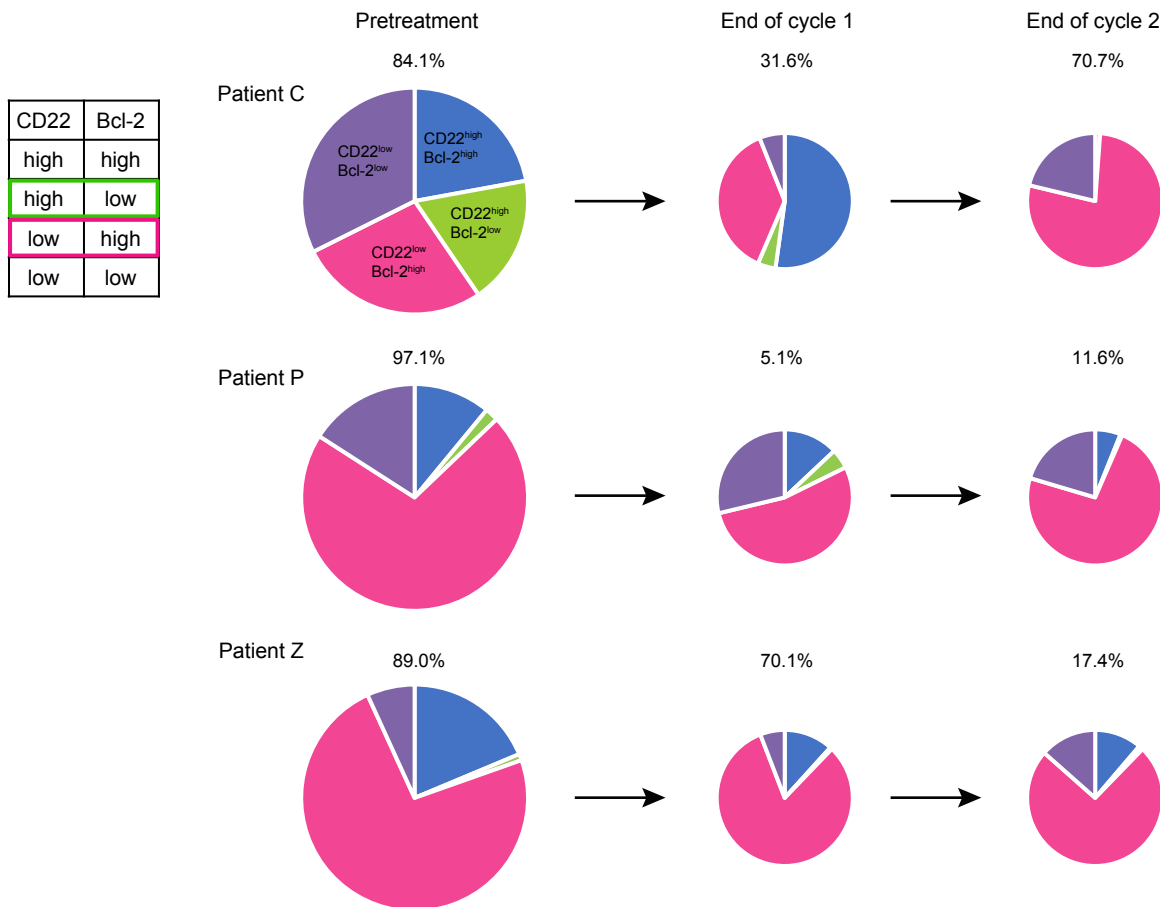

**Supplemental Figure 6. Leukemia cell composition in individual non-CR/CRi patients from the training cohort.**

Pie charts display frequencies of leukemia cell fractions characterized by CD22 and Bcl-2 expression at pretreatment, end of cycle 1, and end of cycle 2. The values above the pie chart are leukemia cell percentages of all nucleated cells at respective time points. Colored boxes indicate the good response marker (CD22<sup>high</sup>Bcl-2<sup>low</sup>, green) and the poor response marker (CD22<sup>low</sup>Bcl-2<sup>high</sup>, pink).

A

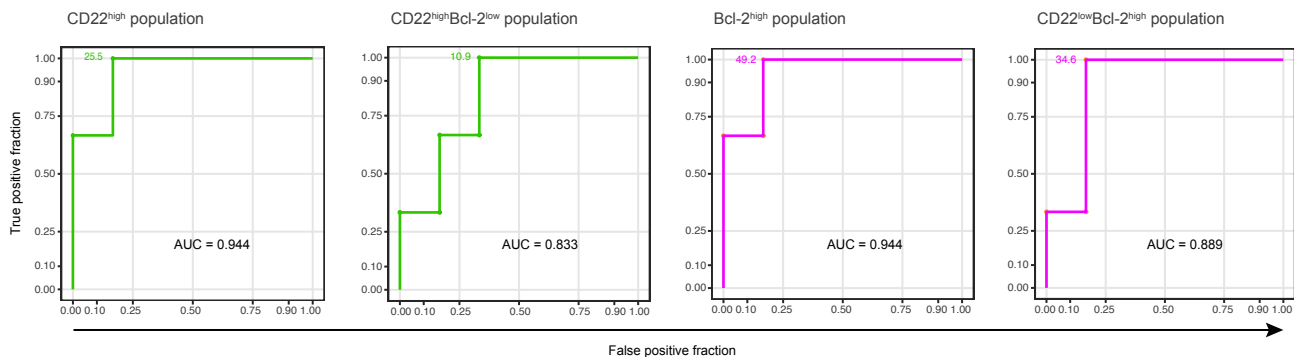

B

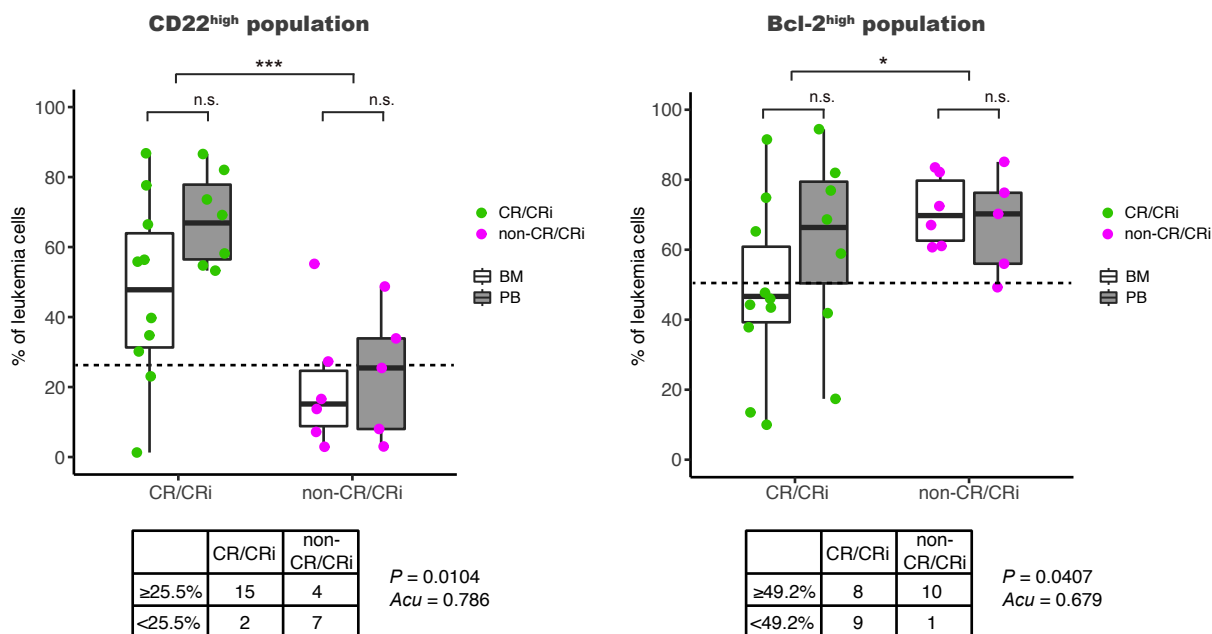

### Supplemental Figure 7. Application of predictive values from training cohort to validation cohort.

(A) ROC curves for good response predictors (green) and poor response predictors (pink) from the training cohort are shown. (B) Boxplots display the frequency of CD22<sup>high</sup> fraction and Bcl-2<sup>high</sup> fraction at pretreatment in CR/CRi (n = 17) and non-CR/CRi patients (n = 11) in either BM samples (white) or peripheral blood samples (gray). Table data insets indicate the number of patients within each therapeutic response category above or below the threshold set by the application of the prediction tool. Statistical significance of leukemia cell frequencies was analyzed using the Student *t* test. Application of predictive values was analyzed with the Fisher's exact test. BM, bone marrow sample; PB, peripheral blood sample; AUC, area under curve; Acu, accuracy. \**P* < 0.05, \*\*\**P* < 0.001

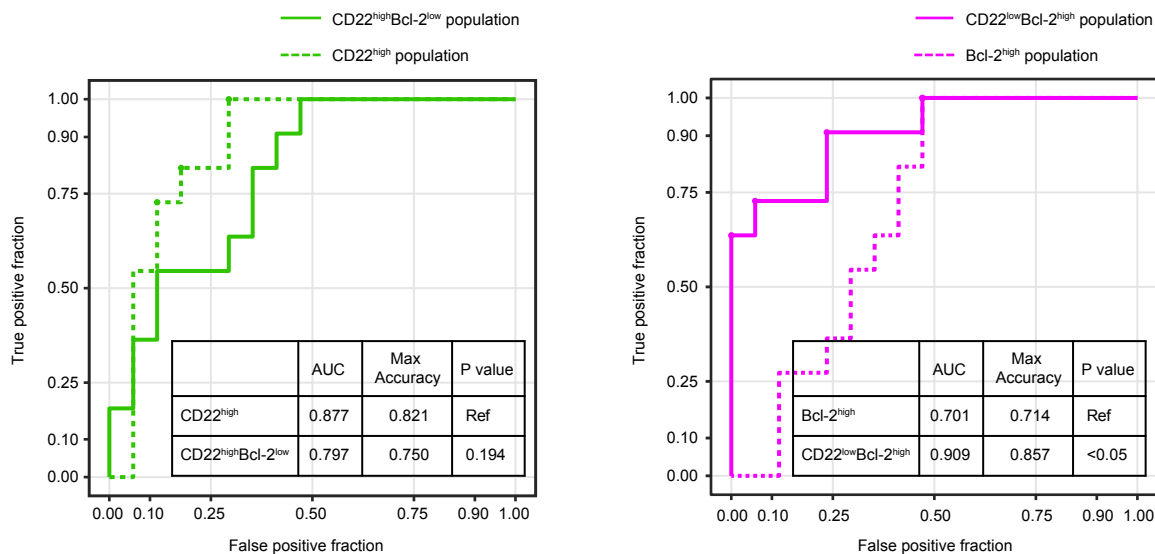

### Supplemental Figure 8. Comparison of predictive values from validation cohort.

ROC curves of the validation cohort shown for good response predictors: CD22<sup>high</sup> cells (dotted green) and CD22<sup>high</sup>Bcl-2<sup>low</sup> cells (solid green), and poor response predictors: Bcl-2<sup>high</sup> cells (dotted pink) and CD22<sup>low</sup>Bcl-2<sup>high</sup> cells (solid pink). The AUC, max accuracy and p values were described on the bottom table insets. AUC of ROC curve of CD22<sup>high</sup>Bcl-2<sup>low</sup> cells and CD22<sup>low</sup>Bcl-2<sup>high</sup> cells were statistically tested with DeLong's test, referring to CD22<sup>high</sup> cells and Bcl-2<sup>high</sup> cells, respectively. BM, bone marrow sample; PB, peripheral blood sample; Acu, accuracy.

\*\* $P < 0.01$ , \*\*\* $P < 0.001$ .

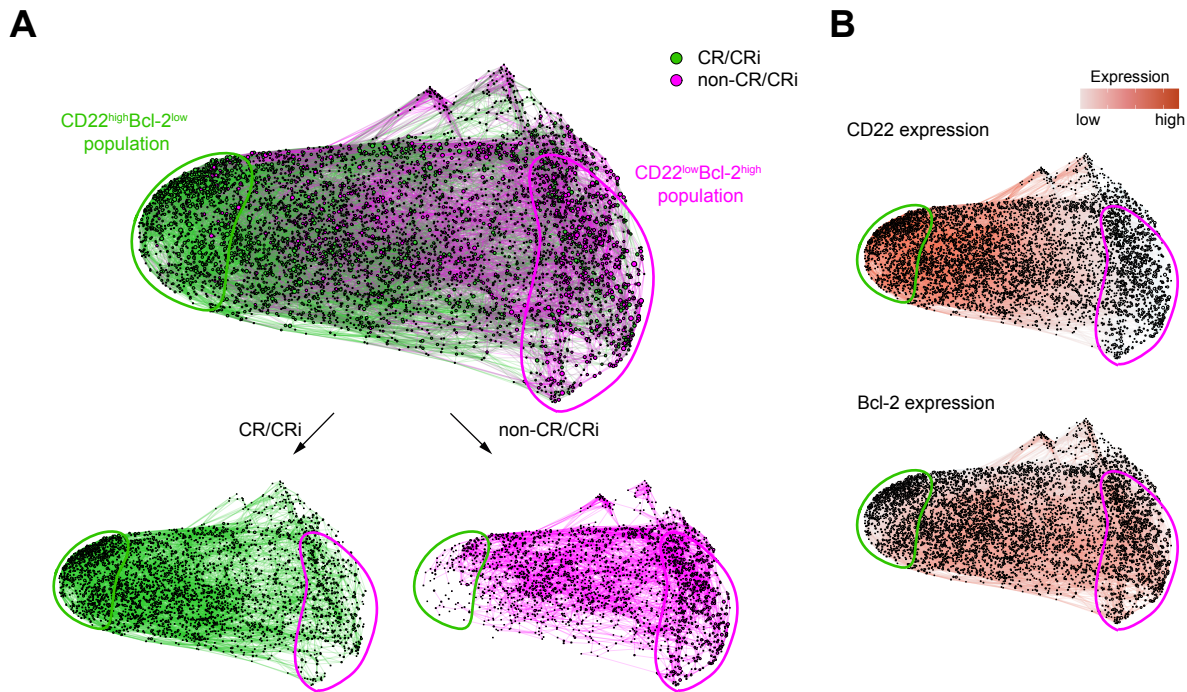

**Supplemental Figure 9. Tumor cell-community clustering of all patients.**

(A) Tumor cell-community clustering plots are shown for pretreatment data compiled from 17 CR/CRi patients (green) and 11 non-CR/CRi patients (pink) in the training and validation cohort. Bulk plots (top) and extracted plots of CR/CRi and non-CR/CRi patients (bottom) are depicted. (B) Distribution of CD22 and Bcl-2 expression on the clustering plots. For (A) and (B), colored shapes indicate CD22<sup>high</sup>Bcl-2<sup>low</sup> population (green) and CD22<sup>low</sup>Bcl-2<sup>high</sup> population (pink) based on the distribution of each marker.



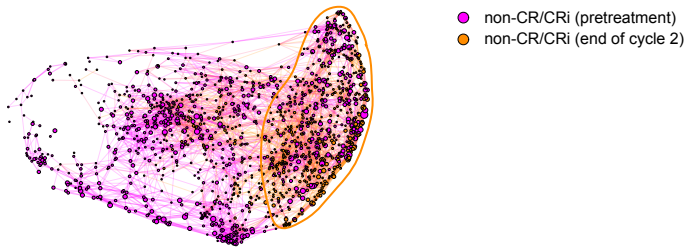

**Supplemental Figure 10. Longitudinal changes by tumor cell-community clustering analysis.**

Clustering plots are shown for longitudinal changes of leukemia cell populations in non-CR/CRi patients (pink: pretreatment, orange: end of cycle 2) from the training cohort. The outlined orange ellipse delineates the leukemia cell population that is a poor response predictor with CD22<sup>low</sup> and Bcl-2<sup>high</sup> expression. The cluster profiles correspond to those in Figure 1A and 1C.

Figure S11.

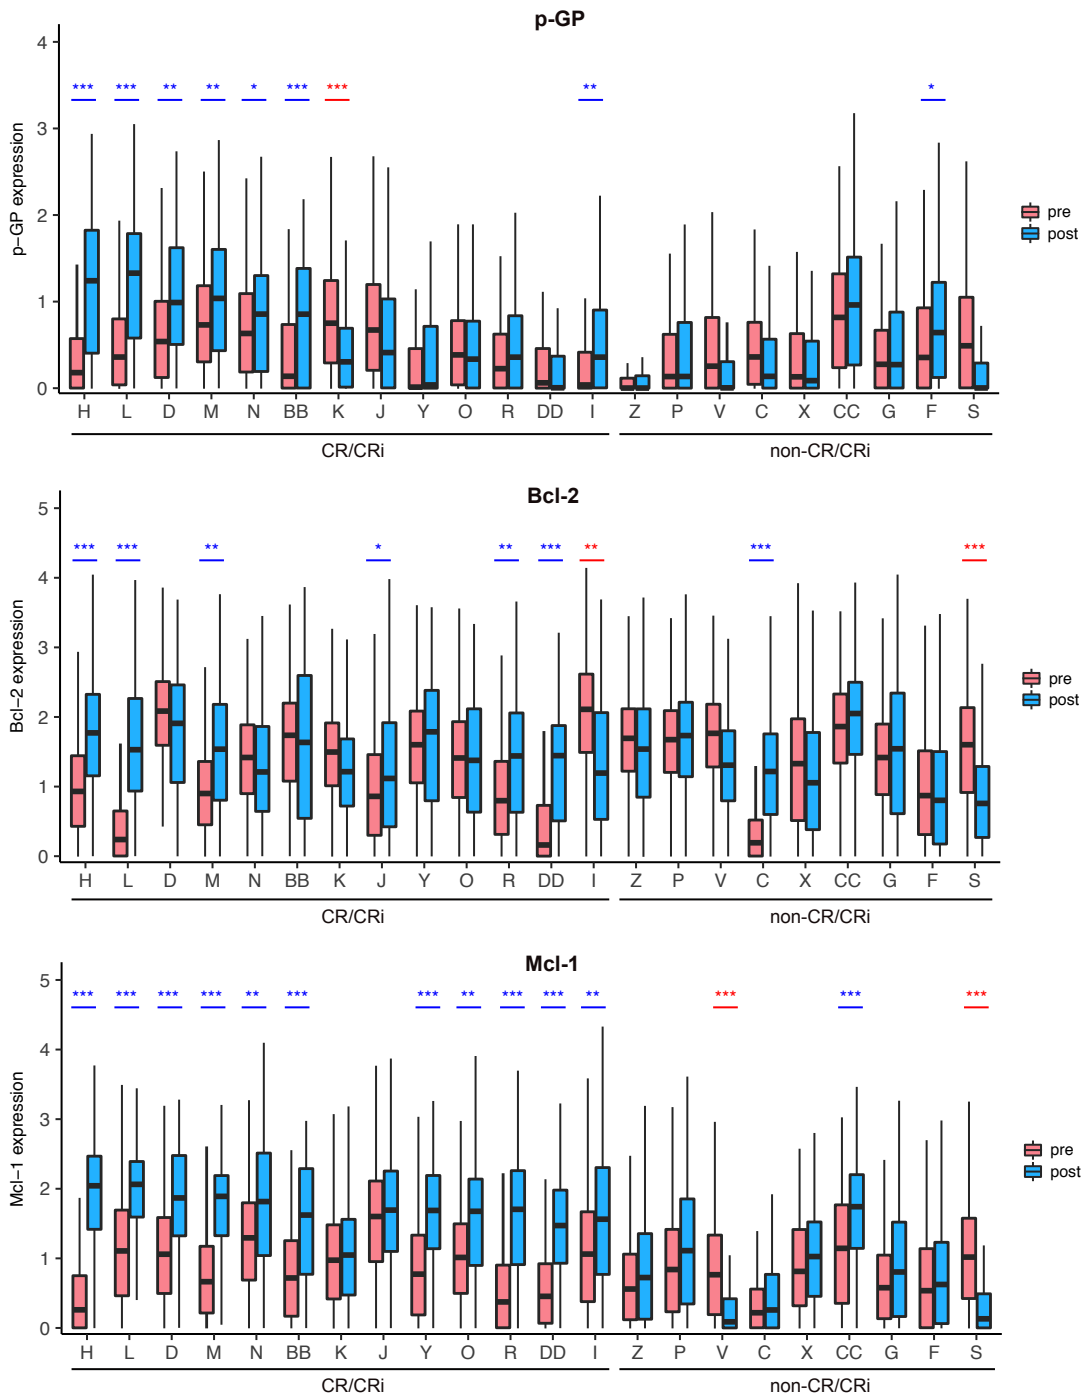

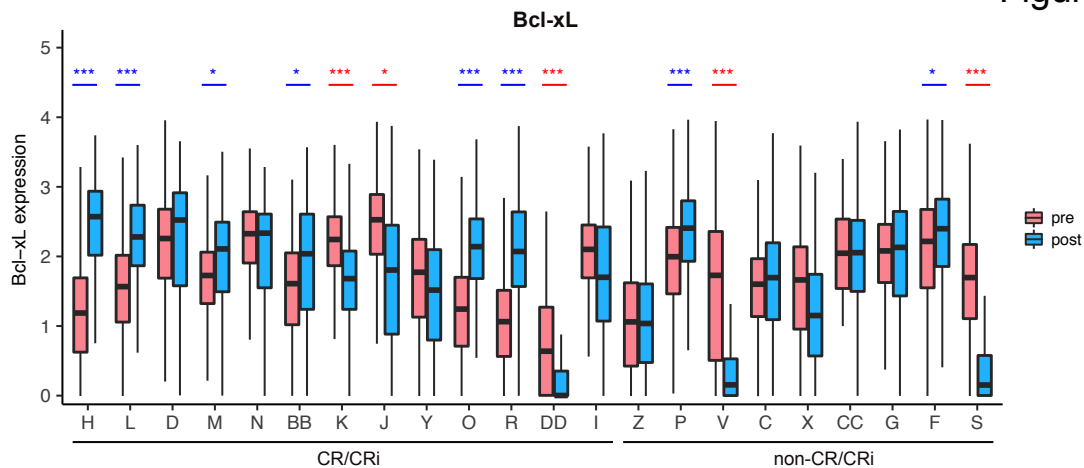

**Supplemental Figure 11. Longitudinal changes of individual tumor profiles.**

Boxplots shown for p-GP, Bcl-2, Mcl-1, Bcl-xL expression of tumor cells at pretreatment (pink) and post treatment (blue). CR/CRi Patients ( $n = 13$ ) with MRD  $\geq 0.1\%$  in marrow cells and non-CR/CRi patients ( $n = 9$ ) are depicted. The order of patients is the same as the heatmap data in Figure 4A. Statistical significance was analyzed with the Student  $t$  test. Blue asterisks indicate an increase at posttreatment. Red asterisks indicate a decrease at posttreatment.  $*P < 0.05$ ,  $**P < 0.01$ ,  $***P < 0.001$ .

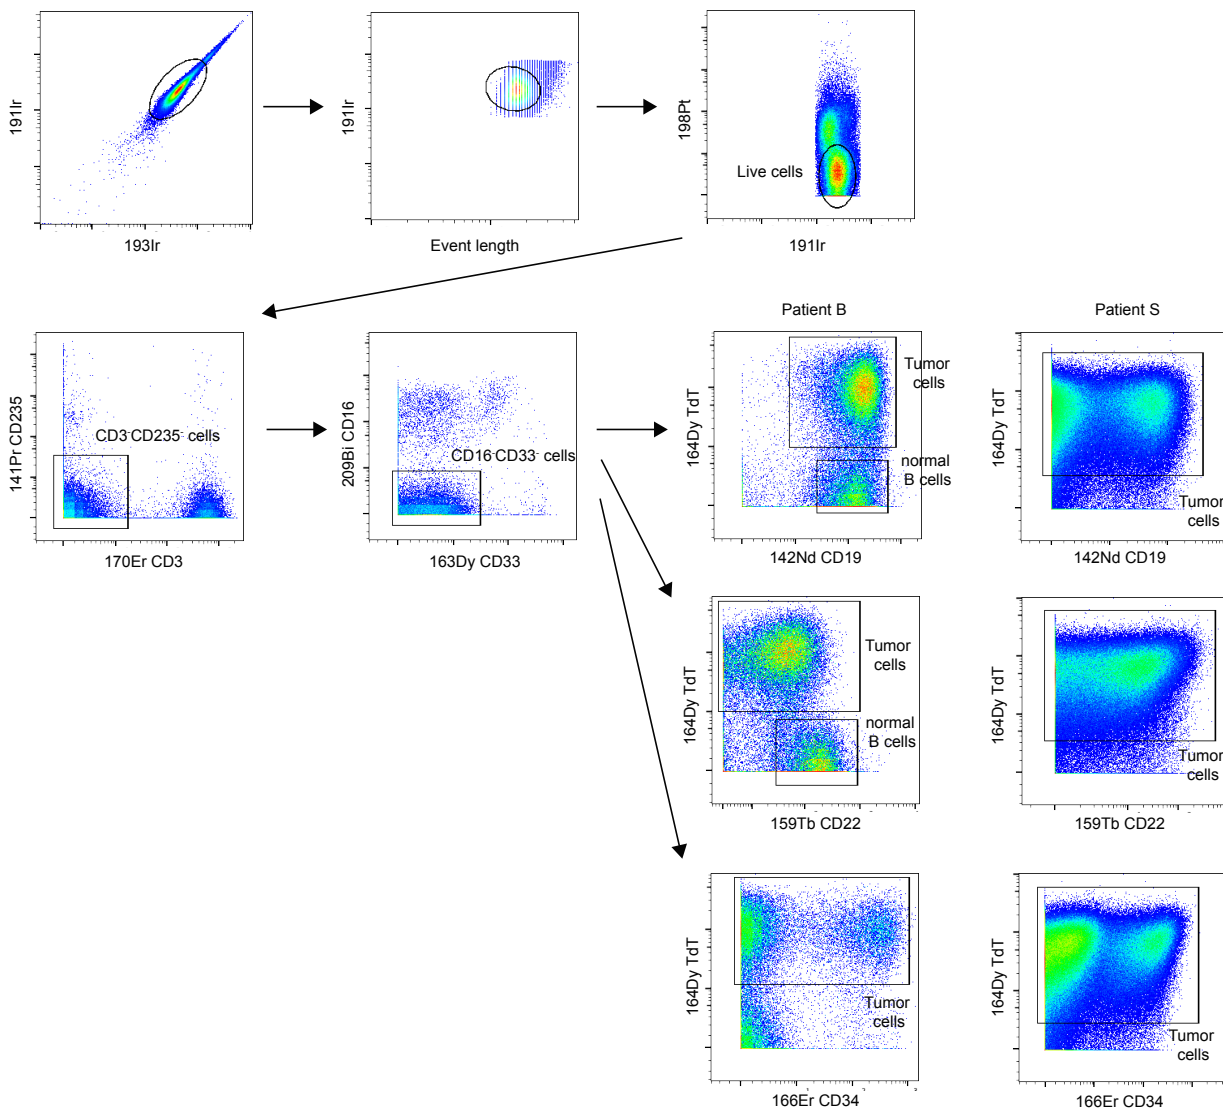

### Supplemental Figure 12. Conventional gating strategy to identify tumor cells.

After gating for singlet, tumor cells were found in CD3<sup>+</sup>CD235<sup>+</sup>CD16<sup>+</sup>CD33<sup>+</sup> or CD33<sup>dim</sup> cells. Then, B-lineage markers and CD34 were used to identify tumor cells. Data represent two patients.
